# Supplementary material for: A Clinical Phenotyping Algorithm to Identify Cases of Chronic Obstructive Pulmonary Disease in Electronic Health Records
Source: bioRxiv or medRxiv preprint supplement (doi:10.1101/716779), 2019-07-28

**Table S1.** ICD codes and semantic phrases considered in algorithm development

| Inclusion Criteria for Cases                                 | Additional Exclusion Criteria for Controls |
|--------------------------------------------------------------|--------------------------------------------|
| ICD-9 Codes                                                  | ICD-9 Codes                                |
| 491.xx: Chronic bronchitis                                   | 493.xx: Asthma                             |
| 492.xx: Emphysema                                            | 516.31: Idiopathic pulmonary fibrosis      |
| 496.xx: Chronic airway obstruction, not elsewhere classified | 135.xx: Sarcoidosis                        |
| 162.xx: Neoplasm of the trachea, bronchus, and lung          |                                            |
| ICD-10 Codes                                                 | ICD-10 Codes                               |
| J41.xx: Simple and mucopurulent chronic bronchitis           | J45.xx: Asthma                             |
| J42.xx: Unspecified chronic bronchitis                       | J84.112: Idiopathic pulmonary fibrosis     |
| J43.xx: Emphysema                                            | D86.xx: Sarcoidosis                        |
| J44.xx: Other chronic obstructive pulmonary disease          |                                            |
| C34.xx: Malignant neoplasm of bronchus and lung              |                                            |
| Problem list text                                            |                                            |
| COPD                                                         |                                            |
| Chronic obstructive pulmonary disease                        |                                            |
| Chronic obstructive lung disease                             |                                            |
| Emphysema                                                    |                                            |
| Chronic bronchitis                                           |                                            |
| Reactive airway(s) disease                                   |                                            |
| Exacerbation                                                 |                                            |
| Oxygen                                                       |                                            |
| O2                                                           |                                            |
| Radiology report text                                        |                                            |
| Emphysema (excluding subcutaneous emphysema)                 |                                            |
| Emphysematous changes                                        |                                            |
| Respiratory medications                                      |                                            |
| Accuneb                                                      |                                            |
| Acridinium                                                   |                                            |

|                |
|----------------|
| Advair         |
| Albuterol      |
| Alvesco        |
| Anoro          |
| Arcapta        |
| Arformoterol   |
| Asmanex        |
| Atrovent       |
| Beclomethasone |
| Beclovent      |
| Breo           |
| Brovana        |
| Budesonide     |
| Ciclesonide    |
| Combivent      |
| Daliresp       |
| Dulera         |
| Duoneb         |
| Entocort       |
| Flovent        |
| Fluticasone    |
| Foradil        |
| Glycopyrrolate |
| Indaceterol    |
| Ipratropium    |
| Lasma          |
| Levalbuterol   |
| Mometasone     |
| Olodaterol     |
| Perforomist    |
| ProAir         |
| Proventil      |
| Pulmicort      |
| QVar           |
| Robinul        |
| Roflumilast    |
| Salbutamol     |

|              |
|--------------|
| Salmeterol   |
| Serevent     |
| Singulair    |
| Spiriva      |
| Symbicort    |
| Theo         |
| Theochron    |
| Theodur      |
| Theophylline |
| Tiotropium   |
| Tudorza      |
| Umeclidinium |
| Uniphyll     |
| Vanceril     |
| Ventolin     |
| Vilanterol   |
| Xopenox      |

**Table S2.** Numbers of cases, controls, indeterminates, and excludes identified among adults over 45 years of age in the Synthetic Derivative (N = 1,008,552).

| <b>Case definition*</b> | <b>Cases, N</b> | <b>Control, N</b> | <b>Indeterminate, N</b> | <b>Exclude, N</b> |
|-------------------------|-----------------|-------------------|-------------------------|-------------------|
| 3+ ICD codes            | 28,520          | 544,056           | 23,091                  | 28,319            |
| ICD code+reg-expr       | 12,622          | 544,056           | 38,989                  | 28,319            |
| PFT                     | 1,873           | 11,203            | NA                      | NA                |

PFT = pulmonary function test, reg ex = regular expression

\*All case definitions also include the requirement that cases have records longer than 180 days.

**Table S3.** Demographic characteristics of COPD cases identified by PFT, 3+ ICD codes, and Code + regex algorithm.

| <b>Variable</b>                               | <b>PFT cases*<br/>N = 1,873</b> | <b>3+ COPD ICD Cases<br/>N = 28,520</b> | <b>Code+Regex Cases<br/>N = 12,622</b> |
|-----------------------------------------------|---------------------------------|-----------------------------------------|----------------------------------------|
| Median age (IQR)                              | 70<br>(62-76)                   | 69<br>(60-76)                           | 70<br>(62-77)                          |
| Sex (%)                                       |                                 |                                         |                                        |
| Female                                        | 911<br>(48.6)                   | 13,356<br>(46.8)                        | 6,163<br>(48.8)                        |
| Male                                          | 962<br>(51.4)                   | 15,164<br>(53.2)                        | 6,459<br>(51.2)                        |
| Unknown                                       | 0<br>(0.0)                      | 0<br>(0.0)                              | 0<br>(0.0)                             |
| Race (%)                                      |                                 |                                         |                                        |
| White                                         | 1,701<br>(90.8)                 | 24,795<br>(86.9)                        | 11,012<br>(87.2)                       |
| Black                                         | 135<br>(7.2)                    | 2,684<br>(9.4)                          | 1,249<br>(9.9)                         |
| Other                                         | 15<br>(0.8)                     | 119<br>(0.4)                            | 46<br>(0.4)                            |
| Unknown                                       | 22<br>(1.2)                     | 922<br>(3.2)                            | 315<br>(2.5)                           |
| Smoking status                                |                                 |                                         |                                        |
| Ever                                          | 1,464<br>(78.2)                 | 15,645<br>(54.9)                        | 7,548<br>(59.8)                        |
| Never                                         | 402<br>(21.5)                   | 2,900<br>(10.2)                         | 1,034<br>(8.2)                         |
| Missing                                       | 7<br>(0.4)                      | 9,975<br>(35.0)                         | 4,040<br>(32.0)                        |
| Median record length (years)<br>(IQR)         | 10.3<br>(5.1-16.1)              | 7.3<br>(3.2-13.0)                       | 8.3<br>(4.0-13.8)                      |
| Number of respiratory meds**<br>(median, IQR) | 188<br>(72-385)                 | 107<br>(32-277)                         | 170<br>(56-387)                        |
| Top 5 phecodes by frequency<br>(%)            |                                 |                                         |                                        |

|   |                                             |                                             |                                             |
|---|---------------------------------------------|---------------------------------------------|---------------------------------------------|
| 1 | Other symptoms of respiratory system (88.7) | Chronic airway obstruction (100)            | Chronic airway obstruction (100)            |
| 2 | Chronic airway obstruction (78.0)           | Hypertension (77.1)                         | Other symptoms of respiratory system (86.1) |
| 3 | Shortness of breath (71.8)                  | Other symptoms of respiratory system (75.4) | Hypertension (80.3)                         |
| 4 | Hypertension (71.8)                         | Essential hypertension (75.4)               | Essential hypertension (78.9)               |
| 5 | Essential hypertension (70.7)               | Tobacco use disorder (63.0)                 | Shortness of breath (73.5)                  |

\*Pulmonary function testing (PFT) cases are defined as individuals with a post-bronchodilator FEV<sub>1</sub>/FVC ratio < 0.7.

\*\*Number of respiratory medications includes only mentions of medications on distinct days.

**Table S4.** Association of known clinical risk factors with COPD in each algorithm set and in the PFT set.

| Risk factor  | 3+ code only |           | Code + regex |             | PFTs |           |
|--------------|--------------|-----------|--------------|-------------|------|-----------|
|              | OR           | 95% CI    | OR           | 95% CI      | OR   | 95% CI    |
| Age          | 1.04         | 1.04-1.04 | 1.05         | 1.05-1.05   | 1.04 | 1.03-1.04 |
| Sex          | 1.40         | 1.37-1.43 | 1.27         | 1.23-1.31   | 1.22 | 1.11-1.34 |
| Ever smoking | 9.22         | 8.87-9.57 | 12.36        | 11.61-13.16 | 3.36 | 3.00-3.75 |

OR: odds ratio; 95% CI: 95% confidence interval

**Table S5.** Comparison of demographics and clinical features for cases (post-bronchodilator FEV<sub>1</sub>/FVC < 0.7) and controls identified by PFTs.

| <b>Characteristic</b>                      | <b>Cases*<br/>N = 1,873</b>                 | <b>Controls*<br/>N = 11,203</b>             | <b>All PFT*<br/>N = 13,076</b>              |
|--------------------------------------------|---------------------------------------------|---------------------------------------------|---------------------------------------------|
| Median age (IQR)                           | 70<br>(62-76)                               | 65<br>(57-72)                               | 65<br>(57-73)                               |
| Sex (%)                                    |                                             |                                             |                                             |
| Female                                     | 911<br>(48.6)                               | 6,023<br>(53.8)                             | 6,934<br>(53.0)                             |
| Male                                       | 962<br>(51.4)                               | 5,179<br>(46.2)                             | 6,141<br>(47.0)                             |
| Unknown                                    | 0<br>(0.0)                                  | 1<br>(0.0)                                  | 1<br>(0.0)                                  |
| Race (%)                                   |                                             |                                             |                                             |
| White                                      | 1,701<br>(90.8)                             | 9,717<br>(86.7)                             | 11,418<br>(87.3)                            |
| Black                                      | 135<br>(7.2)                                | 1,201<br>(10.7)                             | 1,336<br>(10.2)                             |
| Other                                      | 15<br>(0.8)                                 | 162<br>(1.4)                                | 177<br>(1.4)                                |
| Unknown                                    | 22<br>(1.2)                                 | 123<br>(1.1)                                | 145<br>(1.1)                                |
| Smoking status                             |                                             |                                             |                                             |
| Ever                                       | 1,464<br>(78.2)                             | 5,779<br>(51.6)                             | 7,243<br>(55.4)                             |
| Never                                      | 402<br>(21.5)                               | 5,359<br>(47.8)                             | 5,761<br>(44.1)                             |
| Missing                                    | 7<br>(0.4)                                  | 65<br>(0.6)                                 | 72<br>(0.5)                                 |
| Median record length (years) (IQR)         | 10.3<br>(5.1-16.1)                          | 9.5<br>(4.5-15.5)                           | 9.6<br>(4.6-15.6)                           |
| Number of respiratory meds** (median, IQR) | 188<br>(72-385)                             | 168<br>(66-372)                             | 171<br>(67-374)                             |
| Top 5 phecodes by frequency (%)            |                                             |                                             |                                             |
| 1                                          | Other symptoms of respiratory system (88.7) | Other symptoms of respiratory system (84.5) | Other symptoms of respiratory system (85.1) |



|   |                                      |                                  |                                         |
|---|--------------------------------------|----------------------------------|-----------------------------------------|
| 2 | Chronic airway obstruction<br>(78.0) | Hypertension<br>(66.7)           | Hypertension<br>(67.1)                  |
| 3 | Shortness of breath<br>(71.8)        | Essential hypertension<br>(65.6) | Essential hypertension<br>(66.3)        |
| 4 | Hypertension<br>(71.8)               | Shortness of breath<br>(64.1)    | Shortness of breath<br>(65.2)           |
| 5 | Essential hypertension<br>(70.7)     | Diseases of esophagus<br>(54.9)  | Disorders of lipid metabolism<br>(55.2) |

\*Cases, controls, and all PFT data sets were restricted to individuals with record lengths greater than 180 days to be comparable to those identified by the phenotyping algorithm.

\*\*Number of respiratory medications includes only mentions of medications on distinct days.

Figure S1. Phenotyping algorithm with highest PPV in the chart review validation set.

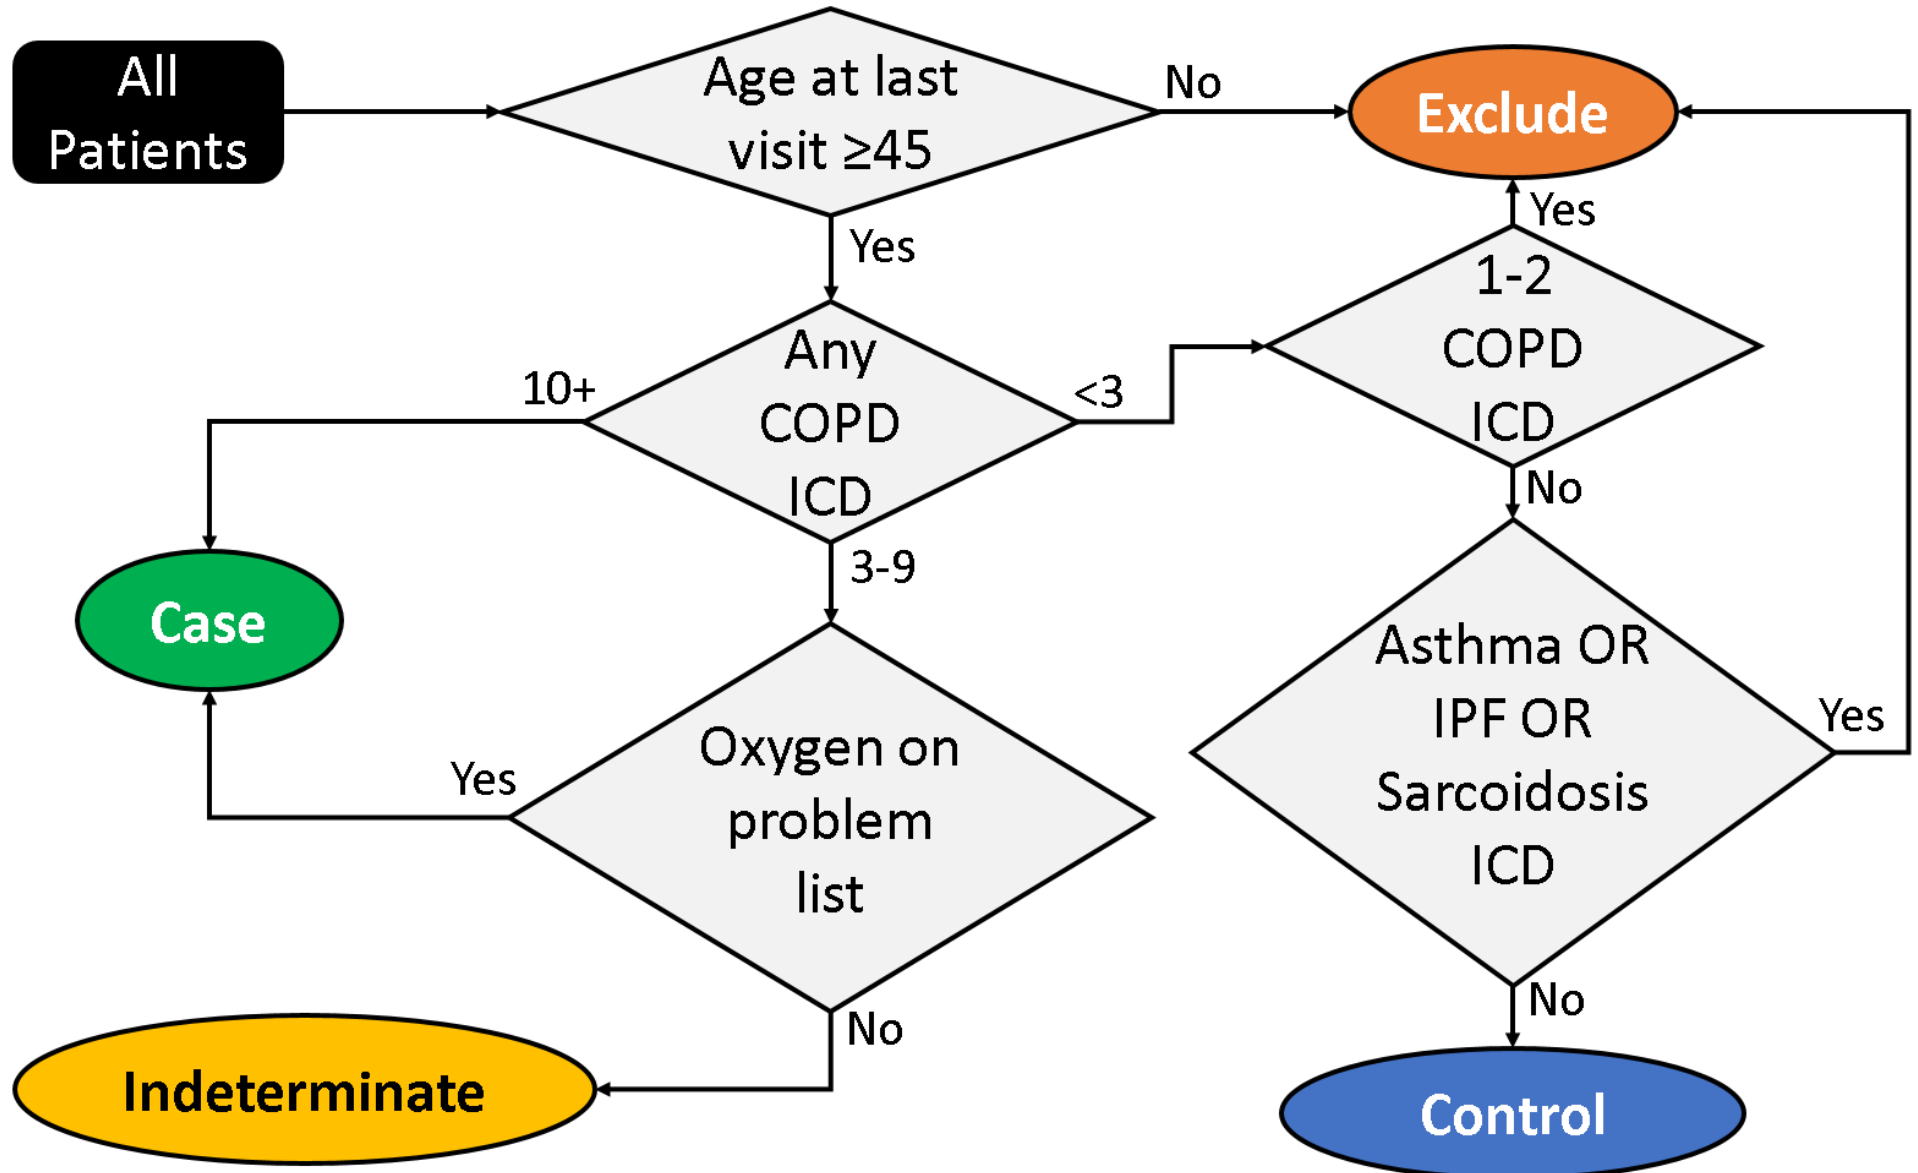

**Figure S2.** Comparison of PFT-defined cases with 3+ ICD codes for COPD and those with fewer than three ICD codes for COPD among individuals with record lengths greater than 180 days. A) Forced expiratory volume in 1 second, pre-bronchodilator. B) Forced expiratory volume in 1 second, post-bronchodilator. C) Forced expiratory volume in 1 second/forced vital capacity, pre-bronchodilator. D) Forced expiratory volume in 1 second/forced vital capacity, post-bronchodilator.

A)

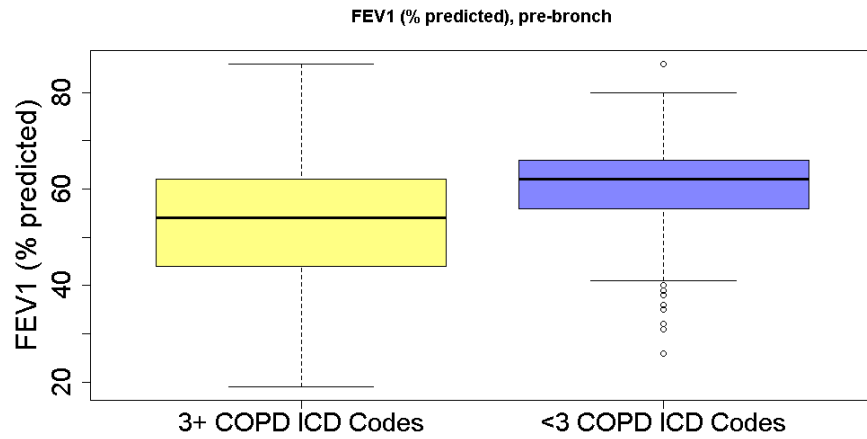

B)

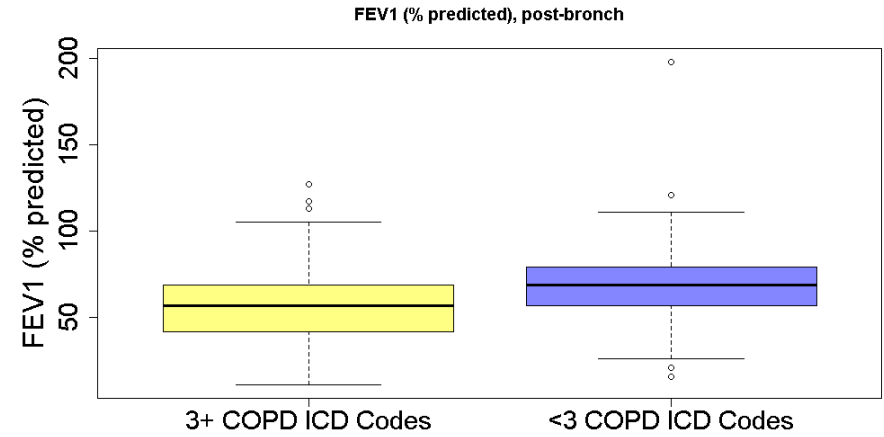

C)

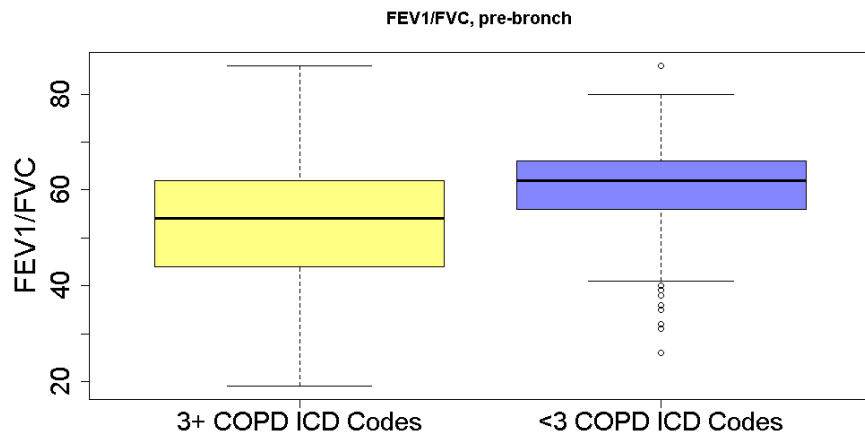

D)

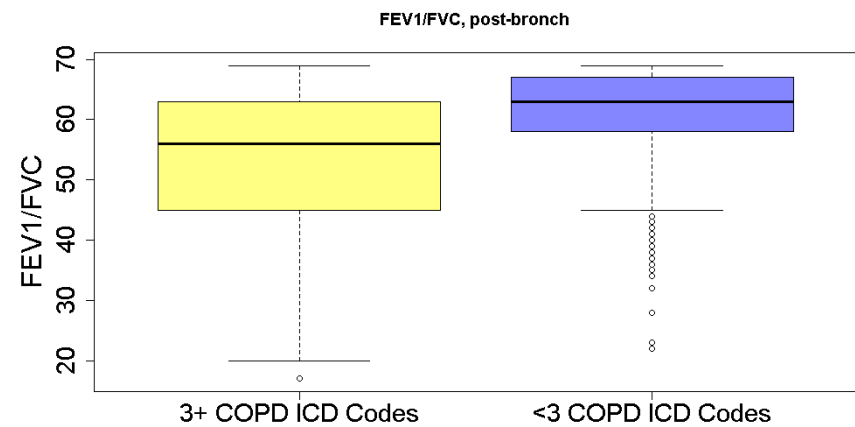

**Figure S3.** Odds ratios from genetic associations of COPD cases (3+ code) and controls in BioVU compared with associations of select variants identified in a prior GWAS of COPD by Wain et al. (32)

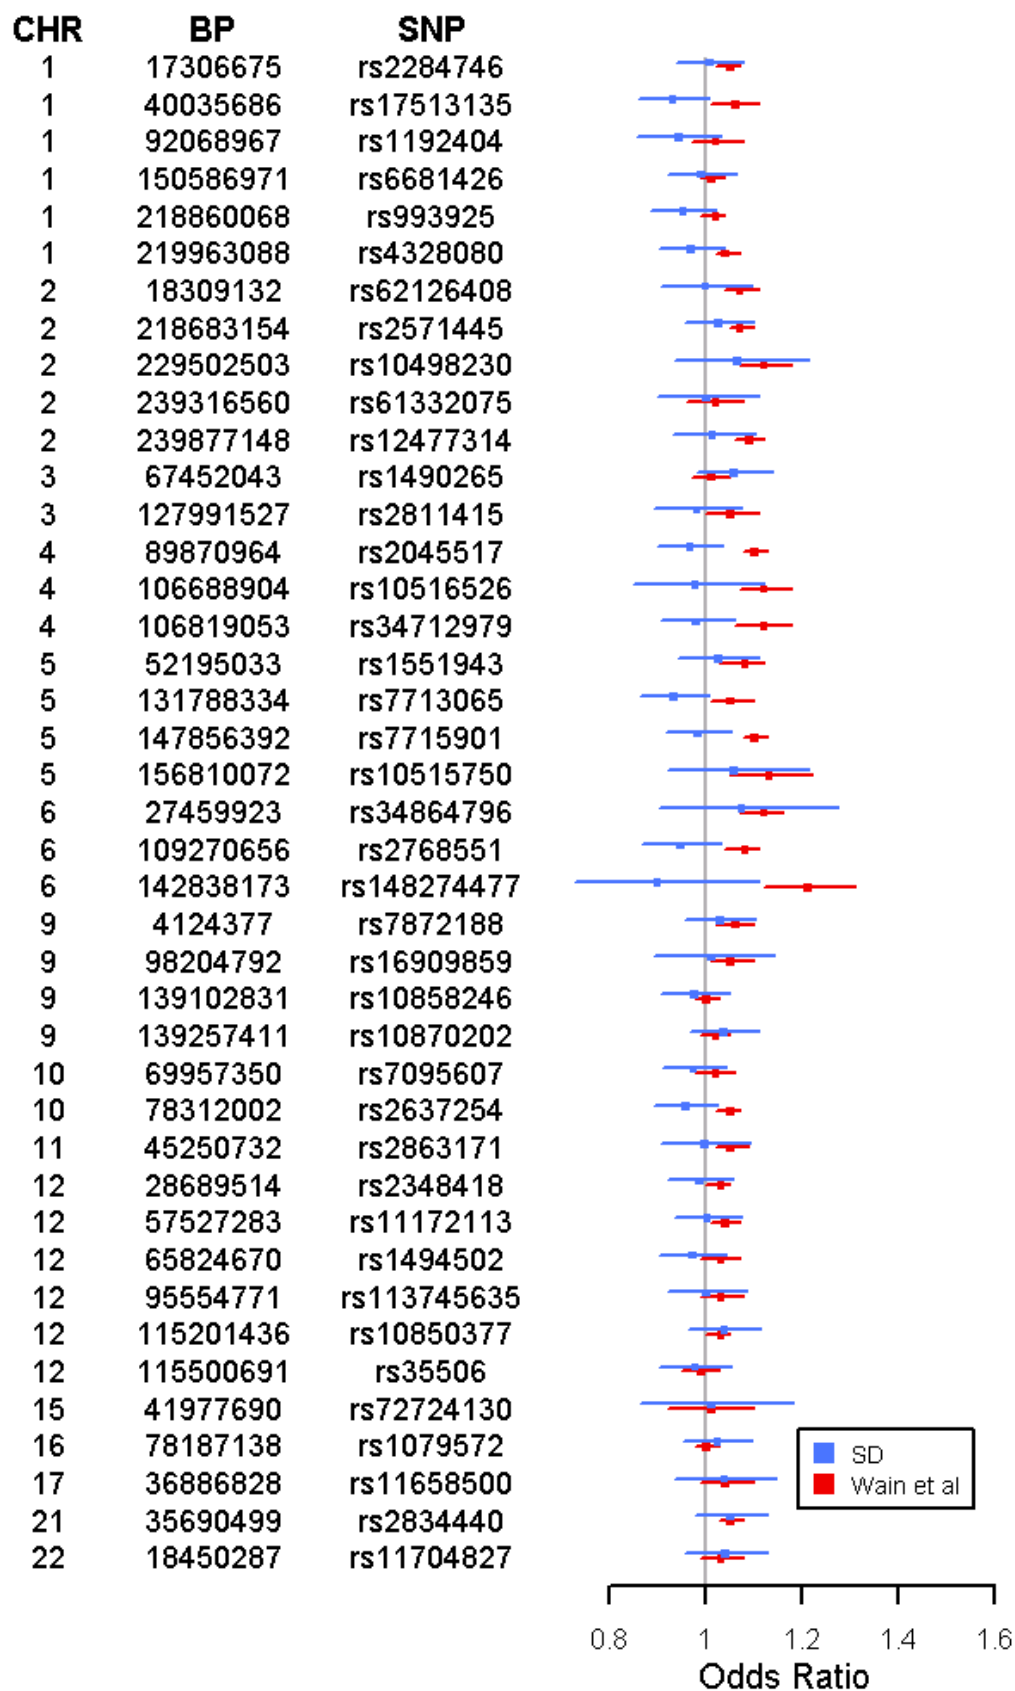

Supplement: Supplementary file [file media-1.pdf]
